# Supplementary material for: A HOPE Online Community Peer Support Intervention for Help Seeking: A Randomized Controlled Trial
Source: Atypon-hosted journal article supplement (doi:10.1176/appi.ps.202000817), 2022-11-15

## 1 **HOPE Study Details**

2 The Harnessing Online Peer Education (HOPE) online intervention involves participants and  
3 peer leaders in an online community.

4 In multiple studies, we have found that the HOPE social media approach is a feasible,  
5 acceptable, and effective method to deliver peer-led behavioral interventions, including among  
6 African Americans and Latinx (1–5): a) HOPE interventions for multiple conditions (e.g., HIV,  
7 substance use, anxiety) have consistently led to significantly more behavior change compared to  
8 control groups, including with studies among communities of color (3,6–9). For example, when  
9 compared with control group participants, intervention group participants were significantly  
10 more likely to accept the offer for the HIV self-testing kit (intervention 130 of 450, 29%; control  
11 102 of 450, 22.7%; odds ratio = 1.43, 95% confidence interval: 1.04 to 1.95,  $P = 0.03$ ), report  
12 having taken an HIV self-test within the past 3 months (odds ratio = 1.47, 95% confidence  
13 interval: 1.01 to 2.13,  $P = 0.04$ ), and report drinking fewer glasses of alcohol in an average week  
14 ( $P = 0.01$ ) (9). HOPE studies have also created long-term, organically-grown, online  
15 communities: For example, in one study, although participation was voluntary, > 80% of  
16 participants actively communicated with other participants (10,11). In that same study, retention  
17 rates were >90% at 12-week follow-up and > 83% at 1-year follow-up. This is particularly  
18 important as most Internet studies have retention rates < 70% (12–15).

## 19 **Participant Recruitment Details**

20 Ads targeted those with anxiety with statements such as, “Anxious about coronavirus?” or,  
21 “Worried about coronavirus?” Ads mentioned that participants would be completing surveys and  
22 joining an online group but did not specifically highlight that they could potentially receive

23 informational resources to help with anxiety (though this is mentioned in the study information  
24 sheet). For those who did not join groups right away, we attempted to replace these participants  
25 before starting the study. If participants hadn't responded by the end of the day, the study team  
26 reached out by email and phone, up to three times per day. After two days of no response,  
27 recruitment was reopened and those who hadn't joined the group were replaced. Recruitment  
28 ads were once again placed and if respondents were eligible and completed the baseline survey,  
29 they were sent an invite to replace an unfilled spot (in order of participant ID). As long as there  
30 were still open spots, those who were replaced were reminded that they could still contact us if  
31 they wanted to continue with the study. If they did reach out in time, they would then replace the  
32 next unfilled spot.

### 33 **Participant Responsibilities/Knowledge Clarification**

34 Participants were told to use the group as they wanted and to continue using Facebook as they  
35 normally would. Participation and engagement in the online community group was voluntary,  
36 and participants could stop engaging/participating at any time. Participants could do everything a  
37 peer leader could do and could make their own posts, direct messages, and real-time chat with  
38 other participants and peer leaders.

39 In the study information sheet, participants were informed that if they were assigned to the  
40 intervention group there would be peer leaders who would attempt to interact with them about  
41 mental health and support topics. Participants were not informed the names of these peer leaders  
42 or who they were. Participants may, however, have been able to know who the peer leaders were  
43 as peer leaders were actively posting and leading conversations on the online community.  
44 Additionally, if participants asked a peer leader if they were a peer leader, peer leaders were  
45 instructed to inform them that they were a peer leader.

## 46 **Peer Leader Training And Supervision Details/Clarifications**

47 Enrolled peer leaders participated in 3 online training sessions (on Zoom) of approximately 3  
48 hours each. Session 1 began with an introduction about the study and the study team, as well as  
49 an ice breaker to get to know each other. This session focused on COVID-19 background  
50 information including symptoms, disease progression, pathophysiology, epidemiology,  
51 prevention and treatment. Misinformation about COVID-19 was also addressed. A quick  
52 overview about Facebook features was also presented. Throughout the session, peer leaders were  
53 asked questions about the topics and also participated in group activities where they would  
54 practice posting and commenting on Facebook. After, the training session, peer leaders were also  
55 given a homework assignment. (i.e. find a video about COVID-19 education and post it in the  
56 group). This was done to help recap what they learned, practice interacting with others on  
57 Facebook, and prepare them for the next training session.

58 Session 2 began with a quick recap of the first session. Components of communication and  
59 various ways of communication were discussed during this session and applied to the Facebook  
60 environment. This session also focused on stigma and mental health. Types of anxiety were  
61 introduced in this session, as well as strategies for coping and how to reduce stigma and anxiety  
62 around COVID-19. The timeline of the study was explained and they were shown how to fill out  
63 the weekly tracking sheet. Weekly topics to go over were also introduced. For example, in the  
64 first week we recommended not even focusing on COVID-19 and just posting about friendly  
65 topics to help build rapport. Overall, we let them know it was a free-flowing group and  
66 conversations within the groups also depended on how participants reacted and what participants  
67 posted or commented about. As with the last session, peer leaders were asked questions  
68 throughout the session and given time to practice communication on Facebook through various

69 activities. Peer leaders were also given another homework assignment to complete before the  
70 final session.

71 Session 3 again began with a recap of the previous session. This session focused on study  
72 logistics. Peer leaders were introduced to the study design and briefed on how participant  
73 recruitment took place/ who the participants are. Peer leaders were also reminded again about  
74 their responsibilities and provided with examples of types of posts to post each week. As with  
75 the previous sessions, peer leaders were asked questions throughout the session and given time to  
76 practice communication on Facebook through various group activities. Finally, it was stressed  
77 that peer leaders were not to give any medical advice and only direct participants who asked to  
78 consult their physician. Any inappropriate posts or concerns about participants were also to be  
79 immediately reported to the study team. Time was also set aside at the end to answer any  
80 pressing questions.”

81 Slides from all three sessions were given to the peer leaders, as well as the electronic resources  
82 that we send participants (slides and resources can be shared upon request). Peer leaders also  
83 joined a private, hidden Facebook group specific to peer leaders. Here peer leaders could ask the  
84 study team questions or ask each other questions, as well as share resources and posts that were  
85 successful or difficult. The study team could also highlight posts that received a lot of  
86 engagement from the previous week.

87 Some peer leaders may choose to do more than others but, every week, peer leaders were tasked  
88 with reaching out to their assigned participants, at least three times per week. Time commitment  
89 for peer leaders ranged from approximately 30 minutes to 3 hours per week. Calls with the study  
90 team for weekly check-in were generally 10-15 minutes. While we shared with them resources  
91 and could highlight examples of successful posts, the content and topic of their posts were solely

92 up to the peer leader. Peer leaders would then complete a tracking sheet every week that  
93 documented who they reached out to and if there was a response. At the end of each week,  
94 someone from the study team would call the peer leaders to check-in, answer any questions, and  
95 discuss any problems (problems with tracking sheet, ideas for posting, etc.). Peer leader training,  
96 peer leaders' ongoing communication with the study team, and peer leaders' ongoing  
97 communication with each other helped guide peer leaders to know how to communicate with the  
98 participants. Content and topics of posts may also depend on how participants interact in the  
99 groups. For example, during training, we give a rough guideline of first 2 weeks are friendly  
100 conversations, next two weeks are about sharing knowledge and experiences, and debunking  
101 myths, and last two weeks are about prevention and coping. If participants already start posting  
102 about myths in the first week or talking about their anxiousness, the peer leaders won't wait till  
103 week 3 or week 5 to address these posts.

#### 104 **Other Study Clarifications**

105 In regards to Facebook groups, private means that only members of the group can see who's in  
106 the group and what they post. Hidden (formerly called secret) means only members can find the  
107 group in search and other places on Facebook. Even if an outsider were to get the group link,  
108 they would only see an error page that says, "This content isn't available right now."

109

110 **University of California, Irvine**  
111 **Study Information Sheet**

112 ***Harnessing Online Peer Education (HOPE) COVID-19/Coronavirus Study***  
113  
114  
115

116 **Lead Researcher**

117 Sean Young, PhD

118 Department of Emergency Medicine, Department of Informatics

119 714-456-5239

120 syoung5@uci.edu  
121  
122

- 123 • Please read the information below and ask questions about anything that you do not  
124 understand. A researcher listed above will be available to answer your questions.  
125
- 126 • You are being asked to participate in a research study. Participation in this study is  
127 voluntary. You may choose to skip a question or a study procedure. You may refuse to  
128 participate or discontinue your involvement at any time without penalty or loss of benefits.  
129 You are free to withdraw from this study at any time. **If you decide to withdraw from this**  
130 **study you should notify the research team immediately.**  
131
- 132 • You are being asked to participate in this research study to study whether peer leaders on  
133 an online social network can help to teach participants about risks, prevention methods, and  
134 to reduce fear and anxiety surrounding COVID-19.  
135
- 136 • You are eligible to participate in this study if you *meet the following inclusion criteria:*  
137
- 138 1. Adults, 18 years or older, who are competent to give informed consent
  - 139 2. English speakers only
  - 140 3. Moderate to severe GAD-7 rating in relation to COVID-19
  - 141 4. Not currently taking anxiety medication
  - 142 5. Uses social media and/or online communities greater than twice per week
  - 143 6. Willing and capable of understanding and assenting to an online informed consent form
  - 144 7. Has, or is willing to accept a friend request and group request from our Facebook social  
145 media page
  - 146 8. Completes the baseline survey  
147
- 148 • The research procedures involve the following:
- 149 1. Fill out an online questionnaire (every two weeks of the study) assessing your  
150 knowledge, attitudes, and behaviors in regards to the Coronavirus. You will also have  
151 the option to email us to receive information about cognitive behavioral therapy and  
152 related resources for reducing health anxiety.
  - 153 2. Join the HOPE online community social networking page. You will be assigned to an  
154 online community. Participants (and peer leaders if you are in the intervention group)  
155 may request to become your social network "friends" and to chat with you. If your  
156 settings allow, we will track your social networks to see how they change and grow.
  - 157 3. Log onto the group and be willing to communicate with the other participants for the 6-  
158 week duration of the study.

159 4. After the 6-week duration of the study, you will be asked to complete another  
160 questionnaire assessing the same items in a 6-week follow-up survey, as well as be  
161 invited to receive resources on how to reduce health anxiety  
162

163 You will be asked to log onto the group page at least 3 times a week for 6 weeks. However,  
164 this participation is voluntary. You will be asked to complete a questionnaire at the  
165 completion of the study, every two weeks of the 6-week study, and at a 6-week follow up.  
166

- 167 • Possible risks/discomforts associated with the study include the following:
  - 168 ○ Risks of breach of confidentiality. While the research team will do their best to  
169 maintain confidentiality, including coding any identifiable data, and storing data  
170 on an secure server, the nature of a Facebook group is such that we cannot  
171 guarantee complete confidentiality due to the possibility, although it may be  
172 discouraged, of group members disclosing information discussed in the group.
  - 173 ○ Emotional risk. Coronavirus is currently a sensitive topic and has caused many  
174 people anxiousness and stress. While we hope that our study will help reduce  
175 stress surrounding the Coronavirus, talking about this topic may trigger an  
176 unwanted emotional response.  
177
- 178 • Participating in this study may help reduce stress and anxiety you may be experiencing due  
179 to the Coronavirus. The results of the research may also benefit society by educating others  
180 about health and the potential for an educational tool in times of public health crises.  
181 Additionally, you may benefit from the study by gaining understanding of healthy behaviors.  
182
- 183 • There are no alternative procedures available. The only alternative is not to participate in  
184 this study.  
185
- 186 • Your participation will be compensated in the form of an online Amazon gift certificate. You  
187 will be paid \$15 for each time you complete the survey, from baseline (plus being fully  
188 enrolled by joining the group) to final, and \$20 in amazon gift cards for completing the 6-  
189 week follow-up post-intervention survey. You will receive a total of \$80 if you complete all  
190 study questionnaires. If you start any of these surveys but do not complete them, or if you  
191 skip any questions, you will still receive your payment for the survey.  
192
- 193 • All research data collected will be stored securely and confidentially. Confidentiality will be  
194 maintained by means of having your responses coded so that they cannot be identified. The  
195 codes will be kept on a computer that will be stored securely. Only the investigator will have  
196 access to this information. Additionally, identifiers might be removed from the identifiable  
197 private information and, after such removal, the information could be used for future  
198 research studies without additional informed consent from you.  
199
- 200 • The research team, authorized UCI personnel, and regulatory entities, may have access to  
201 your study records to protect your safety and welfare.  
202
- 203 • While the research team will make every effort to keep your personal information  
204 confidential, it is possible that an unauthorized person might see it. We cannot guarantee  
205 total privacy.  
206

207 ***Future Research Use***

208 Researchers will use your information to conduct this study. Once the study is done using your  
209 information, we may share them with other researchers so they can use them for other studies  
210 in the future. We will not share your name or any other private identifiable information that would  
211 let the researchers know who you are. We will not ask you for additional permission to share  
212 this de-identified information.  
213

- 214 • To help us protect your privacy, we have obtained a Certificate of Confidentiality from the  
215 National Institutes of Health (NIH). With this Certificate, researchers cannot be forced to  
216 disclose information that may identify you in any federal, state, or local civil, criminal,  
217 administrative, legislative, or other proceedings or be used as evidence, for example, if there  
218 is a court subpoena, unless you have consented for this use. Information, documents, or  
219 biospecimens protected by this Certificate cannot be disclosed to anyone else who is not  
220 connected with the research except, if there is a federal, state, or local law that requires  
221 disclosure (such as to report child abuse or communicable diseases but not for federal,  
222 state, or local civil, criminal, administrative, legislative, or other proceedings, see below); if  
223 you have consented to the disclosure, including for your medical treatment; or if it is used for  
224 other scientific research, as allowed by federal regulations protecting research subjects.  
225

226 The Certificate cannot be used to refuse a request for information from personnel of the  
227 United States federal or state government agency sponsoring the project that is needed for  
228 auditing or program evaluation by NIH which is funding this project. You should understand  
229 that a Certificate of Confidentiality does not prevent you from voluntarily releasing  
230 information about yourself or your involvement in this research. If you want your research  
231 information released to an insurer, medical care provider, or any other person not connected  
232 with the research, you must provide consent to allow the researchers to release it.  
233

234 The Certificate of Confidentiality will not be used to prevent disclosure as required by  
235 federal, state, or local law. Researchers will voluntarily disclose information to prevent  
236 serious harm to you or to someone else including, incidents of a child, elder, and dependent  
237 adult abuse or neglect, which will be reported to the appropriate authorities

238  
239 The Certificate of Confidentiality will not be used to prevent disclosure for any purpose you  
240 have consented to in this informed consent document. You should understand that a  
241 Certificate of Confidentiality does not prevent you or a member of your family from  
242 voluntarily releasing information about yourself or your involvement in this research. It will be  
243 disclosed only with your permission. Identifiers collected (Names, dates, postal addresses,  
244 email addresses, phone numbers, facial images from Facebook profile photo, and IP  
245 addresses) will be removed before any potential future use for research studies without  
246 additional consent from you.  
247

- 248 • The researchers intend to keep the de-identified research data indefinitely.  
249
- 250 • Information collected from you for this study and/or information obtained from Facebook may  
251 be used in this research or other research, and shared with other organizations. You will not  
252 share in any commercial value or profit derived from the use of your information and/or  
253 information obtained from Facebook.  
254



- 255 • Your participation will be compensated in the form of an online Amazon gift certificate. You  
256 will be paid \$15 for each time you complete the survey, from baseline (plus being fully  
257 enrolled by joining the group) to final, and \$20 in amazon gift cards for completing the 6-  
258 week follow-up post-intervention survey. You will receive a total of \$80 if you complete all  
259 study questionnaires. If you decide to withdraw from the study or are withdrawn by the  
260 research team, you will receive compensation for the visits that you have completed.  
261
- 262 • There is no cost to you for participation in this study. However, there may be out-of-pocket  
263 expenses such as parking and transportation fees.  
264
- 265 • If, during the course of this study, significant new information becomes available that may  
266 relate to your willingness to continue to participate, this information will be provided to you  
267 by the research team listed at the top of the form.  
268
- 269 • If you have any comments, concerns, or questions regarding the conduct of this research  
270 please contact the researchers listed at the top of this form.  
271
- 272 • It is important that you promptly tell the researchers if you believe that you have been  
273 injured because of taking part in this study. You can tell the researcher in person or call  
274 him/her at the number listed at the top of this form.  
275
- 276 • Please contact the UCI Institutional Review Board by phone, (949) 824-7295, by e-mail at  
277 [IRB@research.uci.edu](mailto:IRB@research.uci.edu) or at 141 Innovation Drive, Suite 250, Irvine, CA 92697 if you are  
278 unable to reach the researchers listed at the top of the form and have general questions;  
279 have concerns or complaints about the research; have questions about your rights as a  
280 research subject; or have general comments or suggestions.  
281
- 282 • If you have questions about your informed consent or any aspects of this consent form you  
283 can email your questions to [hopeuci@hs.uci.edu](mailto:hopeuci@hs.uci.edu).  
284
- 285 • **What is an IRB?** An Institutional Review Board (IRB) is a committee made up of scientists  
286 and non-scientists. The IRB's role is to protect the rights and welfare of human subjects  
287 involved in research. The IRB also assures that the research complies with applicable  
288 regulations, laws, and institutional policies.  
289

**Figure.** Description of key outcome variables across intervention and control groups: 1a: Number of participants who requested evidence-based self-coping e-resource by the end of the study (i.e. week 6); 1b: Number of participants who showed consistent online engagement over the study period (estimated at study week 6)

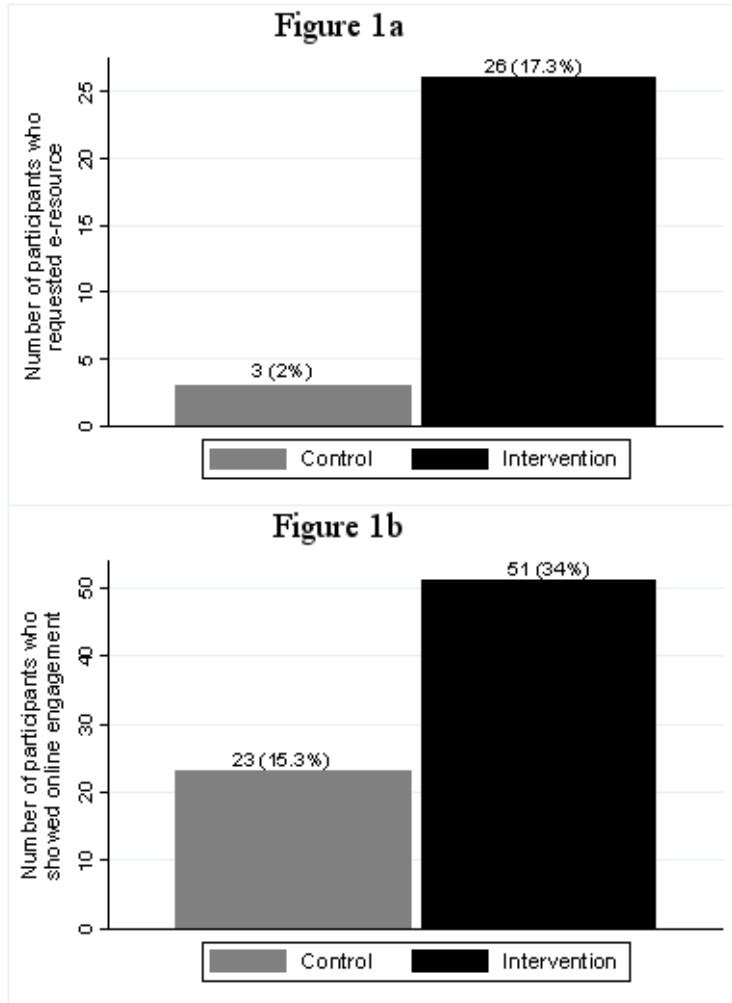

**Figure.** GAD scores at study week 0 and study week 6

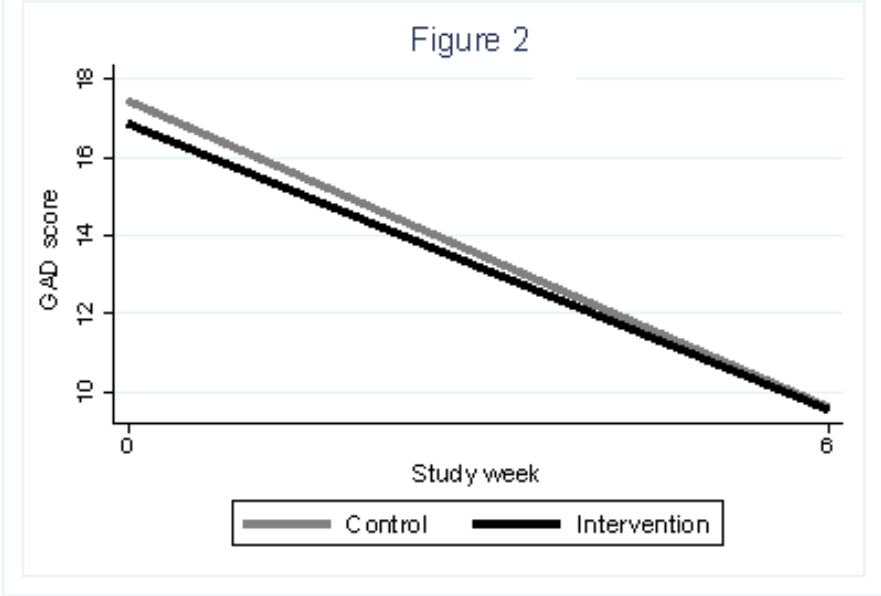

## Additional References

1. Quinn KG. Applying the Popular Opinion Leader Intervention for HIV to COVID-19. *AIDS Behav.* 2020;24(12):3291–4.
2. Young SD, Lee SJ, Perez H, Gill N, Gelberg L, Heinzerling K. Social media as an emerging tool for reducing prescription opioid misuse risk factors. *Heliyon.* 2020 Mar 6;6(3):e03471–e03471.
3. Young SD, Cumberland WG, Lee SJ, Jaganath D, Szekeres G, Coates T. Social Networking Technologies as an Emerging Tool for HIV Prevention. *Ann Intern Med.* 2013 Sep 3;159(5):318–24.
4. Young SD, Koussa M, Lee SJ, Perez H, Gill N, Gelberg L, et al. Feasibility of a social media/online community support group intervention among chronic pain patients on opioid therapy. *J Addict Dis.* 2018 Apr 3;37(1–2):96–101.
5. Young SD, Heinzerling K. The Harnessing Online Peer Education (HOPE) intervention for reducing prescription drug abuse: a qualitative study. *J Subst Use.* 2017;22(6):592–6.
6. Young SD, Cumberland WG, Nianogo R, Menacho LA, Galea JT, Coates T. The HOPE Social Media Intervention for Global HIV Prevention: A Cluster Randomized Controlled Trial in Peru. *Lancet HIV.* 2015 Jan;2(1):e27–32.
7. Young SD, Lee SJ, Perez H, Gill N, Gelberg L, Heinzerling K. Social media as an emerging tool for reducing prescription opioid misuse risk factors. *Heliyon* [Internet]. 2020 Mar 6 [cited 2020 Jul 13];6(3). Available from: <https://www.ncbi.nlm.nih.gov/pmc/articles/PMC7062763/>
8. Singh P, Cumberland WG, Ugarte D, Bruckner TA, Young SD. Association between Generalized Anxiety Disorder (GAD) scores and online activity among US adults during the COVID-19 pandemic: a cross-sectional analysis. *J Med Internet Res.* 2020;
9. Young SD, Cumberland WG, Singh P, Coates T. A Peer-Led Online Community to Increase HIV Self-Testing Among African American and Latinx MSM: A Randomized Controlled Trial. *JAIDS J Acquir Immune Defic Syndr.* 2022 May 1;90(1):20–6.
10. D Young S, Jaganath D. Using social networking technologies for mixed methods HIV prevention research. *J Mob Technol Med.* 2012;1(4S):40.
11. Young SD, Jaganath D. Online social networking for HIV education and prevention: A mixed methods analysis. *Sex Transm Dis.* 2013;40(2).
12. Pequegnat W, Rosser BRS, Bowen AM, Bull SS, DiClemente RJ, Bockting WO, et al. Conducting Internet-based HIV/STD prevention survey research: considerations in design and evaluation. *AIDS Behav.* 2007;11(4):505–21.
13. Salyers Bull S, Lloyd L, Rietmeijer C, McFarlane M. Recruitment and retention of an online sample for an HIV prevention intervention targeting men who have sex with men: the Smart Sex Quest Project. *AIDS Care.* 2004;16(8):931–43.
14. Khosropour CM, Sullivan PS. Predictors of retention in an online follow-up study of men who have sex with men. *J Med Internet Res.* 2011;13(3):e47.

15. Horvath KJ, Nygaard K, Danilenko GP, Goknur S, Oakes JM, Rosser BRS. Strategies to retain participants in a long-term HIV prevention randomized controlled trial: lessons from the MINTS-II study. *AIDS Behav.* 2012;16(2):469–79.

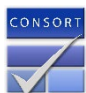

## CONSORT 2010 checklist of information to include when reporting a randomised trial\*

| Section/Topic             | Item No | Checklist item                                                                                                                        | Reported on page No |
|---------------------------|---------|---------------------------------------------------------------------------------------------------------------------------------------|---------------------|
| <b>Title and abstract</b> |         |                                                                                                                                       |                     |
|                           | 1a      | Identification as a randomised trial in the title                                                                                     | 1                   |
|                           | 1b      | Structured summary of trial design, methods, results, and conclusions (for specific guidance see CONSORT for abstracts)               | 1                   |
| <b>Introduction</b>       |         |                                                                                                                                       |                     |
| Background and objectives | 2a      | Scientific background and explanation of rationale                                                                                    | 2                   |
|                           | 2b      | Specific objectives or hypotheses                                                                                                     | 2                   |
| <b>Methods</b>            |         |                                                                                                                                       |                     |
| Trial design              | 3a      | Description of trial design (such as parallel, factorial) including allocation ratio                                                  | 2                   |
|                           | 3b      | Important changes to methods after trial commencement (such as eligibility criteria), with reasons                                    | NA                  |
| Participants              | 4a      | Eligibility criteria for participants                                                                                                 | 2                   |
|                           | 4b      | Settings and locations where the data were collected                                                                                  | 2-4                 |
| Interventions             | 5       | The interventions for each group with sufficient details to allow replication, including how and when they were actually administered | 3                   |
| Outcomes                  | 6a      | Completely defined pre-specified primary and secondary outcome measures, including how and when they were assessed                    | 3-4                 |
|                           | 6b      | Any changes to trial outcomes after the trial commenced, with reasons                                                                 | NA                  |
| Sample size               | 7a      | How sample size was determined                                                                                                        | NA                  |
|                           | 7b      | When applicable, explanation of any interim analyses and stopping guidelines                                                          | NA                  |
| Randomisation:            |         |                                                                                                                                       |                     |

|                                                      |     |                                                                                                                                                                                             |         |
|------------------------------------------------------|-----|---------------------------------------------------------------------------------------------------------------------------------------------------------------------------------------------|---------|
| Sequence generation                                  | 8a  | Method used to generate the random allocation sequence                                                                                                                                      | 3       |
|                                                      | 8b  | Type of randomisation; details of any restriction (such as blocking and block size)                                                                                                         | 3       |
| Allocation concealment mechanism                     | 9   | Mechanism used to implement the random allocation sequence (such as sequentially numbered containers), describing any steps taken to conceal the sequence until interventions were assigned | NA      |
| Implementation                                       | 10  | Who generated the random allocation sequence, who enrolled participants, and who assigned participants to interventions                                                                     | 3       |
| Blinding                                             | 11a | If done, who was blinded after assignment to interventions (for example, participants, care providers, those assessing outcomes) and how                                                    | NA      |
|                                                      | 11b | If relevant, description of the similarity of interventions                                                                                                                                 | NA      |
| Statistical methods                                  | 12a | Statistical methods used to compare groups for primary and secondary outcomes                                                                                                               | 4       |
|                                                      | 12b | Methods for additional analyses, such as subgroup analyses and adjusted analyses                                                                                                            | 4       |
| <b>Results</b>                                       |     |                                                                                                                                                                                             |         |
| Participant flow (a diagram is strongly recommended) | 13a | For each group, the numbers of participants who were randomly assigned, received intended treatment, and were analysed for the primary outcome                                              | 4       |
|                                                      | 13b | For each group, losses and exclusions after randomisation, together with reasons                                                                                                            | 3-4     |
| Recruitment                                          | 14a | Dates defining the periods of recruitment and follow-up                                                                                                                                     | 2-3     |
|                                                      | 14b | Why the trial ended or was stopped                                                                                                                                                          | NA      |
| Baseline data                                        | 15  | A table showing baseline demographic and clinical characteristics for each group                                                                                                            | Table 1 |
| Numbers analysed                                     | 16  | For each group, number of participants (denominator) included in each analysis and whether the analysis was by original assigned groups                                                     | 3-4     |
| Outcomes and estimation                              | 17a | For each primary and secondary outcome, results for each group, and the estimated effect size and its precision (such as 95% confidence interval)                                           | 4       |
|                                                      | 17b | For binary outcomes, presentation of both absolute and relative effect sizes is recommended                                                                                                 | 4       |

|                          |    |                                                                                                                                           |     |
|--------------------------|----|-------------------------------------------------------------------------------------------------------------------------------------------|-----|
| Ancillary analyses       | 18 | Results of any other analyses performed, including subgroup analyses and adjusted analyses, distinguishing pre-specified from exploratory | NA  |
| Harms                    | 19 | All important harms or unintended effects in each group (for specific guidance see CONSORT for harms)                                     | NA  |
| <b>Discussion</b>        |    |                                                                                                                                           |     |
| Limitations              | 20 | Trial limitations, addressing sources of potential bias, imprecision, and, if relevant, multiplicity of analyses                          | 4-5 |
| Generalisability         | 21 | Generalisability (external validity, applicability) of the trial findings                                                                 | 4-5 |
| Interpretation           | 22 | Interpretation consistent with results, balancing benefits and harms, and considering other relevant evidence                             | 5   |
| <b>Other information</b> |    |                                                                                                                                           |     |
| Registration             | 23 | Registration number and name of trial registry                                                                                            | NA  |
| Protocol                 | 24 | Where the full trial protocol can be accessed, if available                                                                               | NA  |
| Funding                  | 25 | Sources of funding and other support (such as supply of drugs), role of funders                                                           | 2   |

\*We strongly recommend reading this statement in conjunction with the CONSORT 2010 Explanation and Elaboration for important clarifications on all the items. If relevant, we also recommend reading CONSORT extensions for cluster randomised trials, non-inferiority and equivalence trials, non-pharmacological treatments, herbal interventions, and pragmatic trials. Additional extensions are forthcoming; for those and for up to date references relevant to this checklist, see [www.consort-statement.org](http://www.consort-statement.org).



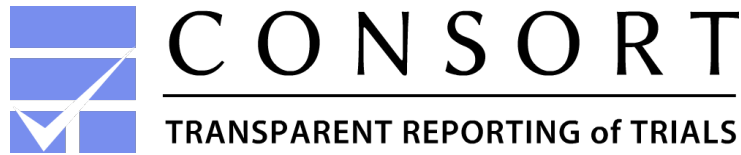

### CONSORT 2010 Flow Diagram

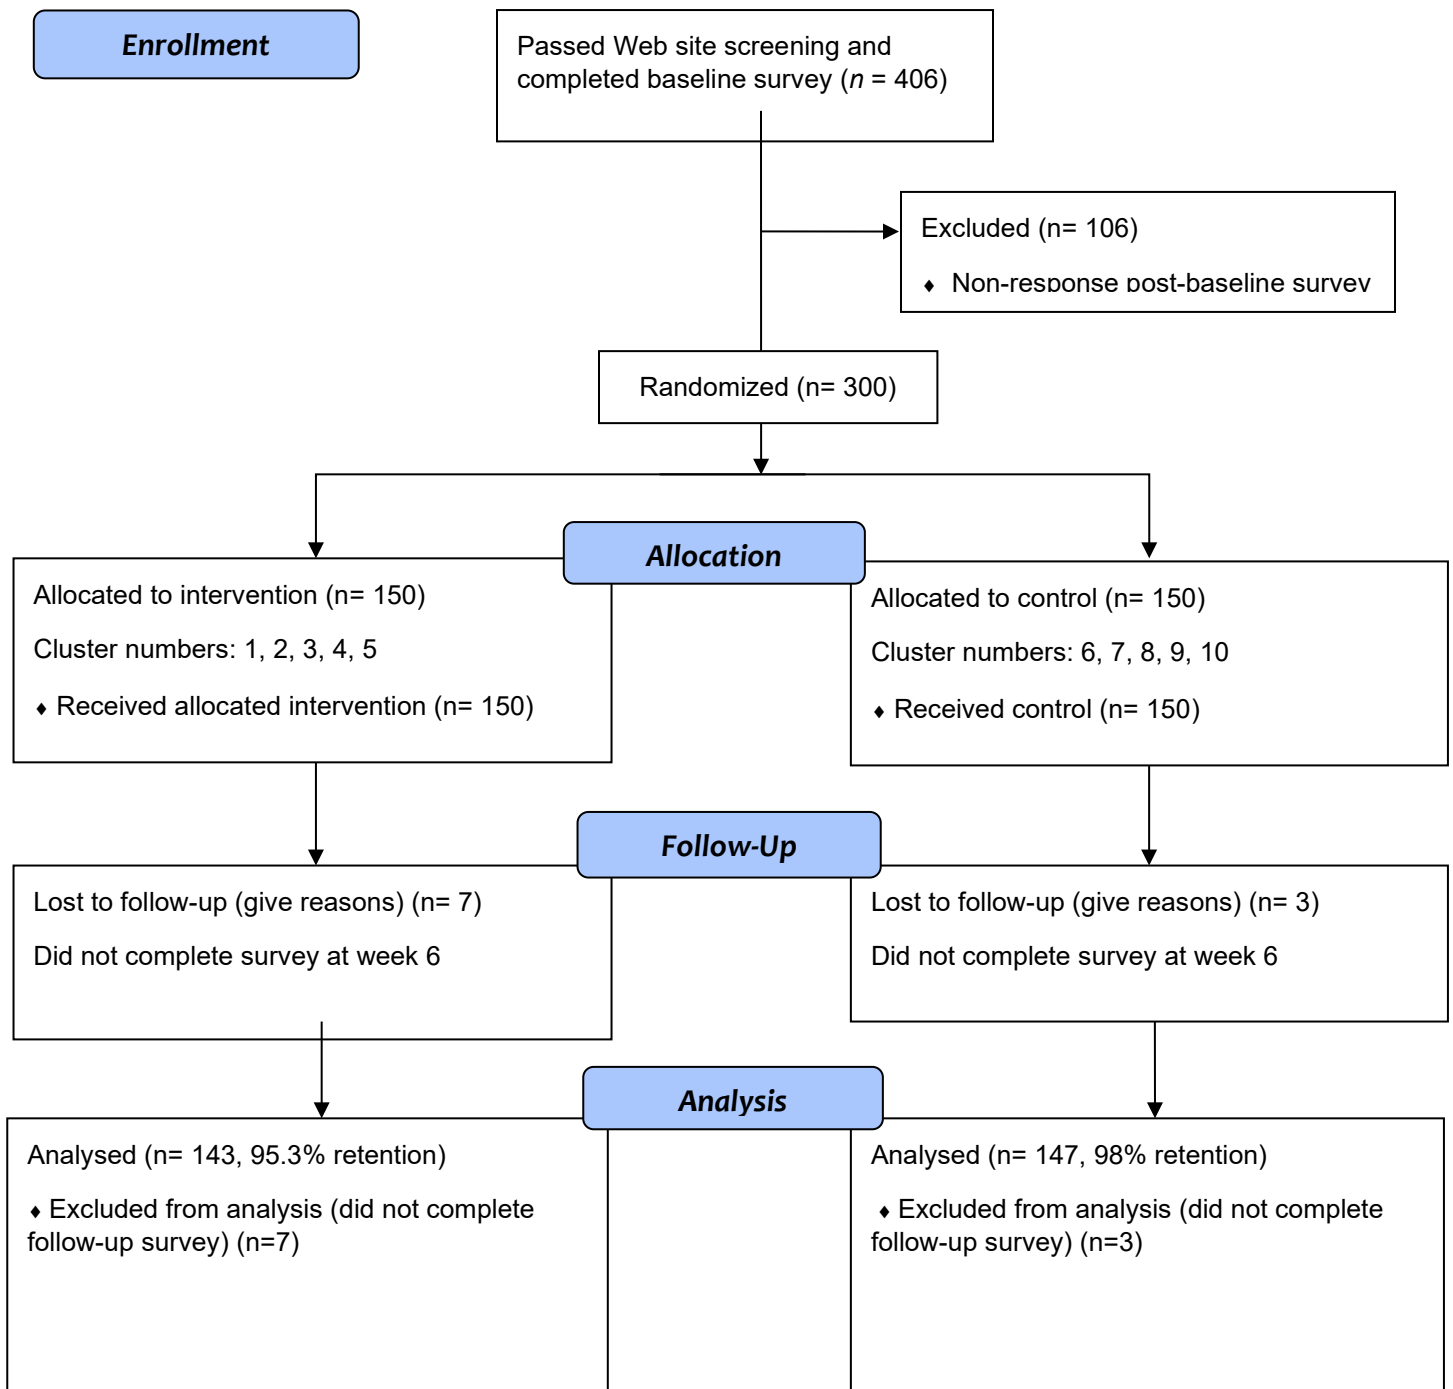

Supplement: appi.ps.202000817.ds001.pdf [file appi.ps.202000817.ds001.pdf]
